# Supplementary material for: Unique Structural Fold of LonBA Protease from Bacillus subtilis, a Member of a Newly Identified Subfamily of Lon Proteases
Source: MDPI journal article supplement (doi:10.3390/ijms231911425), 2022-09-28
Supplement: s1 [file s1]

## Supplementary Material

### **Unique structural fold of LonBA protease from *Bacillus subtilis*, a member of a newly identified subfamily of Lon proteases**

Alla Gustchina<sup>1</sup>, Mi Li<sup>1,2</sup>, Anna G. Andrianova<sup>3</sup>, Arsen M. Kudzhaev<sup>3</sup>, George Lountos<sup>1,2</sup>, Bartosz Sekula<sup>1,4</sup>, Scott Cherry<sup>1</sup>, Joseph E. Tropea<sup>1</sup>, Ivan V. Smirnov<sup>3</sup>, Alexander Wlodawer<sup>1\*</sup>, Tatyana V. Rotanova<sup>\*3</sup>

<sup>1</sup>Center for Structural Biology, National Cancer Institute, Frederick, MD 21702, USA

<sup>2</sup>Basic Science Program, Leidos Biomedical Research, Frederick National Laboratory for Cancer Research, Frederick, MD 21702, USA

<sup>3</sup>Shemyakin-Ovchinnikov Institute of Bioorganic Chemistry, Russian Academy of Sciences, Moscow, 117997, Russia

<sup>4</sup>Institute of Molecular and Industrial Biotechnology, Lodz University of Technology, Lodz, 90-573, Poland

| Chymotrypsin (M234-K235) |                                        | NTD <sup>5H</sup> subdomain                                                                                                                                                                       |  |     |  |     |  |     |  |     |  | Linker-1 |  |     |  |     |  |     |  |     |  | α/β subdomain |  |     |  |  |  |  |  |  |  |
|--------------------------|----------------------------------------|---------------------------------------------------------------------------------------------------------------------------------------------------------------------------------------------------|--|-----|--|-----|--|-----|--|-----|--|----------|--|-----|--|-----|--|-----|--|-----|--|---------------|--|-----|--|--|--|--|--|--|--|
|                          |                                        | 250                                                                                                                                                                                               |  | 260 |  | 270 |  | 280 |  | 290 |  | 300      |  | 310 |  | 320 |  | 330 |  | 340 |  | 350           |  |     |  |  |  |  |  |  |  |
| EcLonA                   | ◀ N and NTD <sup>5H</sup> subdomains ▶ | DAPDENEALKRKIDAAKMPKEAKEKAEELOQLKLMSPMSAEATVVRGYIDWMVQVPWNARSKVKDLRQAQEI <sup>LD</sup> TDHYGLERVKDRILEYLAVQSRVNKIKGPIL                                                                            |  |     |  |     |  |     |  |     |  |          |  |     |  |     |  |     |  |     |  |               |  | 352 |  |  |  |  |  |  |  |
| BsLonA                   | ◀ N and NTD <sup>5H</sup> subdomains ▶ | GKTGEVQTLTEKIEEAGMPDHVKETALKELNRYEKIPSSSAESSVIRNYIDWLVALPWTDETDDKL <sup>LD</sup> KEAGRL <sup>LD</sup> DEHHGLEKVKERILEYLAVQKLT <sup>LD</sup> KSLKGPIL                                              |  |     |  |     |  |     |  |     |  |          |  |     |  |     |  |     |  |     |  |               |  | 350 |  |  |  |  |  |  |  |
| BcLonA                   | ◀ N and NTD <sup>5H</sup> subdomains ▶ | GKGGEVEELREKIEQSGMPEETMKAALKELDRYEKLVPSSAESGVIHNYIDWLLALPWTATTEDMIDLTHSEEILNKDHYGLEKVKERVLEYLAVQKLTNSLKGPIL                                                                                       |  |     |  |     |  |     |  |     |  |          |  |     |  |     |  |     |  |     |  |               |  | 352 |  |  |  |  |  |  |  |
| BhLonA                   | ◀ N and NTD <sup>5H</sup> subdomains ▶ | GKTGEVASLREQIDEANMPENVEEKALKELERYEKMPASSAESSVLRYLDWLIQLPWWKETEDILDVNRAERILDE <sup>LD</sup> DHYGLEKVKERVIEYLAVQQLTKELKGPIL                                                                         |  |     |  |     |  |     |  |     |  |          |  |     |  |     |  |     |  |     |  |               |  | 351 |  |  |  |  |  |  |  |
| BmLonA                   | ◀ N and NTD <sup>5H</sup> subdomains ▶ | GKGGEVEELREKIEQSGMPEETMKAALKELDRYEKLVPSSAESGVIHNYIDWLLALPWTATTEDMIDLTHSEEILNKDHYGLEKVKERVLEYLAVQKLTNSLKGPIL                                                                                       |  |     |  |     |  |     |  |     |  |          |  |     |  |     |  |     |  |     |  |               |  | 352 |  |  |  |  |  |  |  |
| BpLonA                   | ◀ N and NTD <sup>5H</sup> subdomains ▶ | GKTGEVSSLSMKIESSMPSVRE <sup>LD</sup> TALKELNRYEKIPSSSAESSVIRNYIDWLI <sup>LD</sup> GLPGWYITED <sup>LD</sup> RLDKIA <sup>SE</sup> ILDEHHGLEKVKERVLEYLAVQKLTNSLKGPIL                                 |  |     |  |     |  |     |  |     |  |          |  |     |  |     |  |     |  |     |  |               |  | 350 |  |  |  |  |  |  |  |
| BbLonA                   | ◀ N and NTD <sup>5H</sup> subdomains ▶ | GRQGEVDEL <sup>LD</sup> RAGLEKSDAPERIKAKIEKELERLEKMPATSAEGSVIRTYIDTLFALPWTKT <sup>LD</sup> TEDNLDIHHAQQVLDE <sup>LD</sup> DHYGLDKPKERVLEYLAVQKL <sup>LD</sup> VNSMRGPIL                           |  |     |  |     |  |     |  |     |  |          |  |     |  |     |  |     |  |     |  |               |  | 345 |  |  |  |  |  |  |  |
| GtLonA                   | ◀ N and NTD <sup>5H</sup> subdomains ▶ | GKTGEVEALKEKIEAAGMPEHVKETALKELDRYEKIPATSAESAVIRNYLDWLI <sup>LD</sup> ALPWSKETKD <sup>LD</sup> IHDIKRAETILNEEHYGLDKVKERVLEFLSVQQLTQSLKGPIL                                                         |  |     |  |     |  |     |  |     |  |          |  |     |  |     |  |     |  |     |  |               |  | 356 |  |  |  |  |  |  |  |
| PiLonA                   | ◀ N and NTD <sup>5H</sup> subdomains ▶ | GRAGEVEELRSQLEQLP <sup>LD</sup> ERVHEKVEKIDRLEKMPASSAEGGVIRNYVDWLLALPWT <sup>LD</sup> KN <sup>LD</sup> TED <sup>LD</sup> DLIAKAEQVLDE <sup>LD</sup> DHYGLEKPKERVLEYLAVQKL <sup>LD</sup> VKKMKGPIL |  |     |  |     |  |     |  |     |  |          |  |     |  |     |  |     |  |     |  |               |  | 352 |  |  |  |  |  |  |  |
|                          |                                        | 10                                                                                                                                                                                                |  | 20  |  | 30  |  | 40  |  | 50  |  | 60       |  | 70  |  | 80  |  | 90  |  |     |  |               |  |     |  |  |  |  |  |  |  |
| BsLonBA-1                | -----                                  | MSWTGIALFIQLFFGIIIGLYFWNLLKNQRTQKVTIDKESKKEMEQLRKMRAISLSEPLSEKVRPKSFKDIVGQEDGIK-----ALKAALCGPNPQH <sup>LD</sup> V                                                                                 |  |     |  |     |  |     |  |     |  |          |  |     |  |     |  |     |  |     |  |               |  | 93  |  |  |  |  |  |  |  |
| BsLonBA-2                | -----                                  | MSWTGIALFIQLFFGIIIGLYFWNLLKNQRTQKVTIDKESKKEMEQLRKMRAISLSEPLSEKVRPKSFKDIVGQEDGIK-----ALKAALCGPNPQH <sup>LD</sup> V                                                                                 |  |     |  |     |  |     |  |     |  |          |  |     |  |     |  |     |  |     |  |               |  | 93  |  |  |  |  |  |  |  |
| BcLonBA                  | -----                                  | MMSWTNIFLLVQLVFGVIGLYFWHLLRNQRTQKVSIDRESKKEQLRKMREISLTEPLAEKVRPTSF <sup>LD</sup> LDIVGQEDGIK-----SLKAALCGPNPQH <sup>LD</sup> V                                                                    |  |     |  |     |  |     |  |     |  |          |  |     |  |     |  |     |  |     |  |               |  | 94  |  |  |  |  |  |  |  |
| BhLonBA                  | -----                                  | MNNWTGILFVQLFFGVVIGLYFWNLLKTQ <sup>LD</sup> RSQRVSIDRESKKEQLRKLQ <sup>LD</sup> ISLSEPLSEKVRPESFEDIVGQKEGIR-----ALKAALCGPNPQH <sup>LD</sup> V                                                      |  |     |  |     |  |     |  |     |  |          |  |     |  |     |  |     |  |     |  |               |  | 93  |  |  |  |  |  |  |  |
| BmLonBA                  | -----                                  | MSWTNIFLLVQLVFGVIGLYFWHLLRNQRTQKVSIDRESKKEQLRKMREISLTEPLAEKVRPTSF <sup>LD</sup> LDIVGQEDGIR-----SLKAALCGPNPQH <sup>LD</sup> V                                                                     |  |     |  |     |  |     |  |     |  |          |  |     |  |     |  |     |  |     |  |               |  | 93  |  |  |  |  |  |  |  |
| BpLonBA                  | -----                                  | MSWTGIVLFIQLFFGIVIGLYFWNLLRNQRTQKVTIDKESKKEMEALRKMRSIKLSEPLSERVRPKGFQDIVGQEDGIR-----ALKAALCGPNPQH <sup>LD</sup> V                                                                                 |  |     |  |     |  |     |  |     |  |          |  |     |  |     |  |     |  |     |  |               |  | 93  |  |  |  |  |  |  |  |
| BbLonBA                  | -----                                  | MDYTTLVIAVIEVVVGIVIGTYFWNLLRAQRNTKTSTEKSRKDLDSIRKMRMVALTEPLSERTRPATLEEIVGQEDGLR-----ALRAALCGPNPQH <sup>LD</sup> V                                                                                 |  |     |  |     |  |     |  |     |  |          |  |     |  |     |  |     |  |     |  |               |  | 94  |  |  |  |  |  |  |  |
| GtLonBA                  | -----                                  | MNNWTNIVLVQLFFGVVIGLYFWNLLKGQRVKVSIDRESKKEMEQLRKLRSILTEPLAEKVRPKSFDDIVGQEDGIK-----ALKAALCGPNPQH <sup>LD</sup> V                                                                                   |  |     |  |     |  |     |  |     |  |          |  |     |  |     |  |     |  |     |  |               |  | 93  |  |  |  |  |  |  |  |
| PiLonBA                  | -----                                  | MNLISIVIMLVQLFFAVIIGIYFWNLLRGQRTSKTAVDRESRKELDKRLKRSVSLTKPLAEKTRPQTMDDIVGQKDGLR-----ALKAALCSANPQH <sup>LD</sup> V                                                                                 |  |     |  |     |  |     |  |     |  |          |  |     |  |     |  |     |  |     |  |               |  | 93  |  |  |  |  |  |  |  |

|           |      | α/β subdomain |        |        |       |        |          |             |           |          |       |          |           |             |        |      |         |          |       |        |         |         |        |          |         |      |    |     |  |  |  |  |
|-----------|------|---------------|--------|--------|-------|--------|----------|-------------|-----------|----------|-------|----------|-----------|-------------|--------|------|---------|----------|-------|--------|---------|---------|--------|----------|---------|------|----|-----|--|--|--|--|
|           |      | Walker A      |        |        |       |        |          | Pore loop-1 |           |          |       | Walker B |           | Pore loop-2 |        |      |         | RKH loop |       |        |         |         |        |          |         |      |    |     |  |  |  |  |
|           |      | 360           | 370    | 380    | 390   | 400    | 410      | 420         | 430       | 440      | 450   |          |           |             |        |      |         |          |       |        |         |         |        |          |         |      |    |     |  |  |  |  |
| EcLonA    | CLV  | GPPGVGKT      | SLGQSI | AKAT   | ----- | GRKYVR | MALG     | -----       | GVRDEAE   | IRG      | ----- | HRRTY    | IGSMP     | -----       | GKLIQ  | MAKV | GVKNP   | LFLLDE   | IDKMS | SDMRGD | PASALLE | VLVDPE  | QNVA   | FSDH     | 455     |      |    |     |  |  |  |  |
| BsLonA    | CLAG | PPGVGKT       | SLAKSI | AKSL   | ----- | GRKFVR | ISLG     | -----       | GVRDESE   | IRG      | ----- | HRRTY    | VGAMP     | -----       | GRIIQ  | GMMK | KAGKLN  | PVFL     | LLDE  | IDKMS  | SDFRGD  | PSSAMLE | VLVDPE | QNSFS    | SDH     | 453  |    |     |  |  |  |  |
| BcLonA    | CLV  | GPPGVGKT      | SLARSI | ATSL   | ----- | NRNFVR | VSLG     | -----       | GVRDESE   | IRG      | ----- | HRRTY    | VGAMP     | -----       | GRIIQ  | GMMK | KAKTVN  | PVFL     | LLDE  | IDKMS  | NDFRGD  | PAAALLE | VLVDPE | QNHNF    | SDH     | 455  |    |     |  |  |  |  |
| BhLonA    | CLAG | PPGVGKT       | SLARS  | VARAL  | ----- | NREFVR | ISLG     | -----       | GVRDEAE   | IRG      | ----- | HRRTY    | VGAMP     | -----       | GRIIQ  | GMMK | KAGSVN  | PVFL     | LLDE  | IDKMA  | NDFRGD  | PAAALLE | VLVDPE | QNHFT    | SDH     | 454  |    |     |  |  |  |  |
| BmLonA    | CLV  | GPPGVGKT      | SLARSI | ATSL   | ----- | NRNFVR | VSLG     | -----       | GVRDESE   | IRG      | ----- | HRRTY    | VGAMP     | -----       | GRIIQ  | GMMK | KAKTVN  | PVFL     | LLDE  | IDKMS  | NDFRGD  | PAAALLE | VLVDPE | QNHNF    | SDH     | 455  |    |     |  |  |  |  |
| BpLonA    | CLAG | PPGVGKT       | SLAKSI | AKSL   | ----- | DRKFIR | VSLG     | -----       | GVRDESE   | IRG      | ----- | HRRTY    | VGAMP     | -----       | GRIIR  | GMSK | AGTMNP  | PVFL     | LLDE  | IDKMS  | SDFRGD  | PSSAMLE | VLVDPE | QNHNF    | SDH     | 453  |    |     |  |  |  |  |
| BbLonA    | CLV  | GPPGVGKT      | SLARS  | VARAI  | ----- | GREFVR | ISLG     | -----       | GVRDEAE   | IRG      | ----- | HRRTY    | VGALP     | -----       | GRIIQ  | GMMQ | AGTVNP  | PVFL     | LLDE  | IDKL   | ASDFRGD | PASALLE | VLDPN  | QNDKF    | SDH     | 454  |    |     |  |  |  |  |
| GtLonA    | CLAG | PPGVGKT       | SLARSI | AKAL   | ----- | GRRFVR | MSLG     | -----       | GVRDESE   | IRG      | ----- | HRRTY    | VGAMP     | -----       | GRIIQ  | GMMK | AGTINP  | PVFL     | LLDE  | IDKMS  | SDFRGD  | PSSAMLE | VLVDPE | QNHFT    | SDH     | 458  |    |     |  |  |  |  |
| PlLonA    | CLV  | GPPGVGKT      | SLARSI | ARSL   | ----- | ERKFVR | ISLG     | -----       | GVRDEAE   | IRG      | ----- | HRRTY    | VGAMP     | -----       | GRIIQ  | GMMK | TAGSLNP | PVFL     | LLDE  | IDKMS  | ASDFRGD | PSSALLE | VLVDPE | QNTFT    | SDH     | 454  |    |     |  |  |  |  |
|           |      | 100           | 110    | 120    | 130   | 140    | 150      | 160         | 170       | 180      | 190   | 200      | 210       |             |        |      |         |          |       |        |         |         |        |          |         |      |    |     |  |  |  |  |
| BsLonBA-1 | IVY  | GPPGVGKT      | AAARLV | LEEAK  | HKQS  | PFKEQ  | AVFVEL   | DATTAR      | FDERGI    | ADPLIGSV | HDPIY | QAGAMG   | QAGIPQ    | PKQG        | -AVTHA | -HGG | --      | VL       | FIDE  | EIGE   | --      | LH      | --     | PIQMNKML | KVLEDRK | VFLD | SA | 213 |  |  |  |  |
| BsLonBA-2 | IVY  | GPPGVGKT      | AAARLV | LEEAK  | HKQS  | PFKEQ  | AVFVEL   | DATTAR      | FDERGI    | ADPLIGSV | HDPIY | QAGAMG   | QAGIPQ    | PKQG        | -AVTHA | -HGG | --      | VL       | FIDE  | EIGE   | --      | LH      | --     | PIQMNKML | KVLEDRK | VFLD | SA | 213 |  |  |  |  |
| BcLonBA   | IIY  | GPPGVGKT      | AAARLV | LEEAK  | RNP   | KSPFRT | NATFI    | ELDTAT      | ARFDERGI  | ADPLIGSV | HDPIY | QAGAMG   | QAGIPQ    | PKKG        | -AVTDA | -HGG | --      | IL       | FIDE  | EIGE   | --      | LH      | --     | PIQMNKML | KVLEDRK | VFL  | SA | 214 |  |  |  |  |
| BhLonBA   | IIY  | GPPGVGKT      | AAARLV | LVEEAK | KNP   | SPFAH  | DAVFVELD | GT          | TARFDERGI | ADPLIGSV | HDPIY | QAGAMG   | QAGIPQ    | PKQG        | -AVTKA | -HGG | --      | ML       | FIDE  | EIGE   | --      | LH      | --     | SIQINKLL | KVLEDRK | VFL  | SA | 213 |  |  |  |  |
| BmLonBA   | IIY  | GPPGVGKT      | AAARLV | LEEAK  | KNP   | SPFRM  | NATFI    | ELDTAT      | ARFDERGI  | ADPLIGSV | HDPIY | QAGAMG   | QAGIPQ    | PKKG        | -AVTDA | -HGG | --      | IL       | FIDE  | EIGE   | --      | LH      | --     | PIQMNKML | KVLEDRK | VFL  | SA | 213 |  |  |  |  |
| BpLonBA   | IVY  | GPPGVGKT      | AAARLV | MEEAK  | RHADS | SPFKK  | DAVFVELD | TAT         | ARFDERGI  | ADPLIGSV | HDPIY | QAGAMG   | QAGIPQ    | PKQG        | -AVTHA | -HGG | --      | VL       | FIDE  | EIGE   | --      | LH      | --     | PIQMNKML | KVLEDRK | VFLD | SA | 213 |  |  |  |  |
| BbLonBA   | IIY  | GPPGVGKT      | AAARLV | LEEAK  | KNP   | QSPFSS | DAKFIE   | IDATTAR     | FDERGI    | ADPLIGSV | HDPIY | QAGS     | SLGQAGIPQ | PKPG        | -AVTKA | -HGG | --      | ML       | FIDE  | EIGE   | --      | LH      | --     | PIQMNKLL | KVLEDRK | VFL  | SA | 214 |  |  |  |  |
| GtLonBA   | IIY  | GPPGVGKT      | AAARLV | LEEAK  | KNP   | SPFKK  | NAVFVELD | TAT         | ARFDERGI  | ADPLIGSV | HDPIY | QAGAMG   | QAGIPQ    | PKQG        | -AVTNA | -HGG | --      | VL       | FIDE  | EIGE   | --      | LH      | --     | PIQMNKLL | KVLEDRK | VFL  | SA | 213 |  |  |  |  |
| PlLonBA   | IIY  | GPPGVGKT      | AAARLV | MEEAK  | KNP   | SPFKY  | DAKFTIE  | IDATTAR     | FDERGI    | ADPLIGSV | HDPIY | QAGAMG   | QAGIPQ    | PKPG        | -AVTKA | -HGG | --      | IL       | FIDE  | EIGE   | --      | LH      | --     | PIQMNKLL | KVLEDRK | VFL  | SA | 213 |  |  |  |  |

| ← α/β subdomain   α subdomain →         |                |                    |                          |                      |               |                         |                  |                |               |              |                                     |                                     |                                        |                     |                   |            |     |
|-----------------------------------------|----------------|--------------------|--------------------------|----------------------|---------------|-------------------------|------------------|----------------|---------------|--------------|-------------------------------------|-------------------------------------|----------------------------------------|---------------------|-------------------|------------|-----|
| RKH loop                                |                |                    | SRH region               |                      |               |                         |                  |                |               |              |                                     |                                     |                                        |                     |                   |            |     |
|                                         |                |                    | s1                       | RF                   | ▼Chymotrypsin |                         |                  | s2             |               |              |                                     |                                     |                                        |                     |                   |            |     |
| 460                                     | 470            | 480                | 490                      | 500                  | 510           | 520                     | 530              | 540            | 550           | 560          |                                     |                                     |                                        |                     |                   |            |     |
| EcLonA                                  | YLEVDYD-----   | LSDVMFVATSN-----   | S-MNI-PAPLLDRMEVIRLSGYT  | EDEKLNIAKRHLHPKQIERN | ALKKGE        | LTVD                    | DS               | AI             | IGIIRYYTREAGV | RLEREISKL    | CRKAVKQLLLDKS                       | 564                                 |                                        |                     |                   |            |     |
| BsLonA                                  | YIETTFD-----   | LSKVLFIATAN-----   | NLATI-PGPLDRMEIINI       | IAGYTEIEKLEIVKDHL    | LPKQIKEHGLKKS | NLQLRD                  | QA               | ILDIIRYYTREAGV | RS            | LERQLAAICRKA | AKAIVAEER                           | 563                                 |                                        |                     |                   |            |     |
| BcLonA                                  | YIEEPYD-----   | LSKVMFVATAN-----   | TLATANTLASV-PGPLDRMEIISI | AGYTELEKVHIAREHLL    | PKQLKEHGLRKG  | NLQVRDE                 | ALLEIIRYYTREAGV  | RTL            | ERQIAKVCR     | KA           | AKIIVTAER                           | 571                                 |                                        |                     |                   |            |     |
| BhLonA                                  | YIEEPYD-----   | LSKVMFITAN-----    | NIMTI-PGPLDRMEIISI       | AGYTEVEKQRIALDYLL    | PKQMEHGLTKGT  | FQVKEE                  | AILKVIRYYTREAGV  | RS             | LERQMATLC     | CRGAKMLV     | SGKK                                | 564                                 |                                        |                     |                   |            |     |
| BmLonA                                  | YIEEPYD-----   | LSKVMFVATAN-----   | TLASV-PGPLDRMEIISI       | AGYTELEKVHIAREHLL    | PKQLKEHGLRKG  | NLQVRDE                 | ALLEIIRYYTREAGV  | RTL            | ERQIAKVCR     | KA           | AKIIVTAER                           | 565                                 |                                        |                     |                   |            |     |
| BpLonA                                  | YIETTFD-----   | LSQVLFIATAN-----   | NLATI-PGPLDRMEIITI       | AGYTEVEKAEIVKDHL     | LPKQLKEHGLKKN | LQLEAAIYDTIRYYTREAGV    | RL               | ERQLAAICRKA    | ARAIVAE       | DR           |                                     | 563                                 |                                        |                     |                   |            |     |
| BbLonA                                  | YIEETYD-----   | LTNVMFITAN-----    | SLDTI-PRPLDRMEVIS        | ISSYTELEKLNILRDYLL   | PKQM          | QDHGLGDKLKMND           | DAMKLVLRYTREAGV  | RNL            | NREANVCR      | KA           | AKLIVGGEK                           | 564                                 |                                        |                     |                   |            |     |
| GtLonA                                  | YIEEPYD-----   | LSKVMFIATAN-----   | NLATI-PQPLDRMEIITH       | IPGYTEVEKLHIAKRHL    | LPKQLAEHGLKKA | ALQVRDDAMLDIIRHYTREAGV  | RE               | LERQLAAICRKA   | ARLIVS        | GEK          |                                     | 569                                 |                                        |                     |                   |            |     |
| PILonA                                  | FIEIPFD-----   | LSQVMFVTAN-----    | ALHNI-PRPLDRMEVLY        | IPGYTEIEKLQIANRYLL   | LPQKSEHGLEPE  | QLQVDEGALLKVIREYTRESGVR | NLE              | QQVAALCRKA     | AKRIVT        | NES          |                                     | 565                                 |                                        |                     |                   |            |     |
| ▼Chymotrypsin                           |                |                    |                          |                      |               |                         |                  |                |               |              |                                     |                                     |                                        |                     |                   |            |     |
| 220                                     | 230            | 240                | 250                      | 260                  | 270           | 280                     | 290              | 300            | 310           | 320          |                                     |                                     |                                        |                     |                   |            |     |
| BsLonBA-1                               | YYSEENTQIPNHIH | DIFQNGLPAD         | FRILGATT                 | -----RMPNEIPP        | AIRSR         | CLEVF                   | FRELEKDELKT      | VAKTAADKI      | -----EKNIS    | -----EEGLDL  | LLTSY-TRN--GREAVNMIQIAAGMAVTE---NRK | 322                                 |                                        |                     |                   |            |     |
| BsLonBA-2                               | YYSEENTQIPNHIH | DIFQNGLPAD         | FRILGATT                 | -----RM              | PNEIPP        | AIRSR                   | CLEVF            | FRELEKDELKT    | VAKTAADKI     | -----EKNIS   | -----EEGLDL                         | LLTSY-TRN--GREAVNMIQIAAGMAVTE---NRK | 322                                    |                     |                   |            |     |
| BcLonBA                                 | YYSEENTMIPTIYI | HDIFQKGLPAD        | FRILGATT                 | -----RSPEEIPPAIRS    | CLEVF         | FRLEDT                  | EEIQK            | VAKNAADKV      | -----EMQIG    | -----ENGIE   | MIGMY-ARN--GREAINLVQISAGMAINE---ERS | 330                                 |                                        |                     |                   |            |     |
| BhLonBA                                 | YYSEENQQIPRHIH | EIFQKGLPAD         | FRILGATT                 | -----RMPEEIPPAIRS    | CLEVF         | FRSLK                   | KREEIVTI         | AKAVNRL        | -----GFKAE    | -----EGVYE   | KISAY-ATN--GRET                     | VNIVQIAAGMATTE---GRH                | 322                                    |                     |                   |            |     |
| BmLonBA                                 | YYSEENS        | MIPTIYIHDIFQKGLPAD | FRILGATT                 | -----RSPDEIPPAIRS    | CLEVF         | FRLEDT                  | EEIQK            | VAKNAAEKV      | -----KMEIG    | -----KQG     | VE                                  | MIGMY-ARN--GREAINLVQISAGMAINE---GRS | 322                                    |                     |                   |            |     |
| BpLonBA                                 | YYSEENTQIPNHIH | DIFQNGLPAD         | FRILGATT                 | -----RTPDEIPPAIRS    | CLEIF         | FKDL                    | DQHEL            | I              | VA            | AKAVQKI      | -----QKELS                          | -----DEGL                           | NLLTSY-VKN--GREAVNMMVQIAAGMAVTE---NRK  | 322                 |                   |            |     |
| BbLonBA                                 | YYSEENNQIPSHIH | DVFKYGLPAD         | FRILGATT                 | -----RLPEELPAALRS    | CLEIF         | FRPLK                   | AGEIG            | CI             | VRT           | AVPKM        | -----NMNIE                          | -----DS                             | AVSVIERY-ATN--GREAINLVQISAGMAINE---ERQ | 323                 |                   |            |     |
| GtLonBA                                 | YYSKENQIPSHIH  | DIFQNGLPAD         | FRILGATT                 | -----RTPNEIPPAIRS    | CLEVF         | FRLEDT                  | QDE              | I              | AL            | IAKRAAEKI    | -----RLNVS                          | -----ES                             | GIRLLAAY-ARN--GREAVNMMQIAAGLAITE---NRE | 322                 |                   |            |     |
| PILonBA                                 | YNSSEDANTPAYI  | HDIFQNGLPAD        | FRILGATT                 | -----RSPEEVAPALRS    | CMEIF         | FRPL                    | P                | EEIG           | KIA           | EDAIQKI      | -----GLGAA                          | -----PE                             | AVDVVKQY-CSN--GREAVNMIQIAAGLAITE---KRD | 322                 |                   |            |     |
| ▼Chymotrypsin                           |                |                    |                          |                      |               |                         |                  |                |               |              |                                     |                                     |                                        |                     |                   |            |     |
| ← α subdomain   Linker-2 →   P domain → |                |                    |                          |                      |               |                         |                  |                |               |              |                                     |                                     |                                        |                     |                   |            |     |
| 570                                     | 580            | 590                | 600                      | 610                  | 620           | 630                     | 640              | 650            | 660           | 670          |                                     |                                     |                                        |                     |                   |            |     |
| EcLonA                                  | LKHIEINGDN     | LHDYLG---          | VQRF                     | DYGRADNENRV          | QGV           | TGLAWTEVGG--            | DLT              | TIETACVP       | KGK---        | LYT          | TGSL-----GEVMQESIQAA                | LTVVRAAEKLG                         | INPDFYEKRD                             | IHVHVP              | PEG               | 671        |     |
| BsLonA                                  | -KRITVTEKN     | LQDFIG---          | KRIF                     | RYGQAE               | TDQVG         | VVTGLAYTTVGG--          | DTLS             | IEVSLSPGK      | GK---         | LILT         | TGKL-----GDVMRESAQAA                | FSYVRSKTEELGI                       | EPDFHEKYD                              | IHIHVP              | PEG               | 669        |     |
| BcLonA                                  | -KRIVVTEKN     | IVDLLG---          | KHIF                     | RYGQAE               | KTQVG         | MATGLAYTAAGG--          | DTLA             | IEVSVAPG       | GK---         | LILT         | TGKL-----GDVMKESAQAA                | FSYIRSRAEELH                        | IDPDFHEKND                             | IHIHVP              | PEG               | 677        |     |
| BhLonA                                  | -KRIVVVTQNT    | ITETMLG---         | KKRF                     | RYGLAE               | EQDQV         | GAAATGLAYTTAGG--        | DTLS             | IEVSVVP        | GK---         | LILT         | TGKL-----GDVMKESAQAA                | FSYIRSRSKELD                        | IDPSFHEKND                             | IHIHVP              | PEG               | 670        |     |
| BmLonA                                  | -KRIVVTEKN     | IVDLLG---          | KHIF                     | RYGQAE               | KTQVG         | MATGLAYTAAGG--          | DTLA             | IEVSVAPG       | GK---         | LILT         | TGKL-----GDVMKESAQAA                | FSYIRSRAEELH                        | IDPDFHEKND                             | IHIHVP              | PEG               | 671        |     |
| BpLonA                                  | -KRITVTEKN     | LSEFLG---          | KRLY                     | RYGQAE               | TTDQV         | GVVTGLAYTTVGG--         | DTLS             | IEVSLSPG       | GK---         | LILT         | TGKL-----GDVMRESAQAA                | FSYIRSKADELN                        | IDPNFNEKHD                             | IHIHVP              | PEG               | 669        |     |
| BbLonA                                  | -KRIVVTVKT     | LETLLG---          | KPRY                     | RYGLAE               | IKDQV         | GSVTGLAWTQAGG--         | DTLN             | VEVSILP        | GK---         | LILT         | TGKL-----GDVMKESAQAA                | FSYIRSRAEQW                         | IDPAFHEKND                             | IHIHVP              | PEG               | 670        |     |
| GtLonA                                  | -KRIVVVTQNN    | IEEFLG---          | KRKY                     | RYGQAE               | EDQIG         | VATGLAYTAFGG--          | DTLA             | IEVSLAK        | NGK---        | LILT         | TGKL-----GDVMKESAQAA                | FSYVRSRAEELG                        | IDPKFHETYD                             | IHIHVP              | PEG               | 675        |     |
| PILonA                                  | -DSIVIGADDI    | KDYL---            | IPKF                     | RYGMAE               | LEDQV         | GTVTGLAWTEVGG--         | ETLT             | IEVTVP         | PGTGK---      | LILT         | TGKL-----GDVMKESAQAA                | FSFTRSKAELG                         | IDPDFHEKLD                             | VHIHVP              | PEG               | 671        |     |
| ▼Chymotrypsin                           |                |                    |                          |                      |               |                         |                  |                |               |              |                                     |                                     |                                        |                     |                   |            |     |
| 340                                     | 350            | 360                | 370                      | 380                  | 390           | 400                     | 410              | 420            | 430           |              |                                     |                                     |                                        |                     |                   |            |     |
| BsLonBA-1                               | DIT-----       | IEDIEWIHSSQL       | TPKH                     | EQKIG                | VEPQVG        | IVNGLAVY                | GPNSGSLLEIEVSVTA | AQD--          | KGSINITGIAE   | EEESIGSQSKS  | IRRKSMAGKS                          | SVENVLT                             | VLRTMG-----MKPSDYD                     | IHINFP-G            | 437               |            |     |
| BsLonBA-2                               | DIT-----       | IEDIEWIHSSQL       | TPKH                     | EQKIG                | VEPQVG        | IVNGLAVY                | GPNSGSLLEIEVSVTA | AQD--          | KGSINITGIAE   | EEESIGSQSKS  | IRRKSMAGKS                          | SVENVLT                             | VLRTMG-----MKPSDYD                     | IHINFP-G            | 437               |            |     |
| BsLonBA-3D                              |                |                    |                          |                      | GVEPQVG       | IVNGLAVY                | GPNSGSLLEIEVSVTA | AQD--          | KGSINITGIAE   | EEESIGSQSKS  | IRRKSMAGKS                          | SVENVLT                             | VLRTMG-----MKPSDYD                     | IHINFP-G            | 437               |            |     |
| BcLonBA                                 | FIK-----       | DEDIEWVHSSQL       | TPKYE                    | KHIYPIPRIG           | LVNGLAVY      | GPNTGALLEIEVTA          | IAKAKD--         | IGSVNVTG       | IV            | EEESIGSQTKS  | IRRKSMAGKS                          | VDNVL                               | RVLRSLD-----VLPEGYD                    | IHINFP-G            | 438               |            |     |
| BhLonBA                                 | EVT-----       | VADVEWVIHSSQL      | SPRPERQIP                | SEP                  | KVGLVNG       | LAVFGPNTGALLEIEV        | VDVIPSVA--       | EGSVTITG       | IAE           | EEETGNQARS   | IRRKSMAGKS                          | SVENVLT                             | TVLKKMD-----LPIDQYD                    | IHINFP-G            | 437               |            |     |
| BmLonBA                                 | FIK-----       | DEDIEWVHSSQL       | TPKYE                    | KRIYPIPKIG           | LVNGLAVY      | GPNTGALLEIEVMA          | IPAAE--          | KGTINVTG       | IV            | EEESIGSQTKS  | IRRKSMAGKS                          | VDNVL                               | TVLRSLD-----LLPEGYD                    | IHINFP-G            | 437               |            |     |
| BpLonBA                                 | DIT-----       | IEDVEWVIHSSQL      | TPRYEQ                   | KVPKPGV              | GVNGLAVY      | GPNSGALLEIEVNI          | CKALE--          | KGSINITGIAE    | EEESIGNQSKS   | IRRKSMAGKS   | SVENVLT                             | TVLRNLG-----IRTNEYD                 | IHINFP-G                               | 437                 |                   |            |     |
| BbLonBA                                 | DIQ-----       | AADVEWVMHSSQ       | KSPREKQ                  | VHDT                 | TPQVGLV       | NGLAVYGP                | NMGSM            | LEV            | TASPA         | AVPGQGRMAMT  | GMAEEEMG                            | SR                                  | SRTIRRKSMAGKS                          | IENVLT              | TVLSRMG-----VRPYD | YDLHINFP-G | 440 |
| GtLonBA                                 | KIL-----       | DKDIEWVIHSSQ       | MAPRYE                   | KKIGSAP              | AVGVNGLAVY    | GPNTGALLEIEV            | TALPAK--         | KGSINVTG       | IV            | EEESIGSPEKS  | VRRKSMARG                           | SAENVIT                             | TVLRAMG-----VPADRYD                    | IHINFP-G            | 434               |            |     |
| PILonBA                                 | SIR-----       | ASDVEWVASSQ        | IQPRPDR                  | KVPEK                | PQIGV         | VNGLAVYGP               | NMGALLEIEV       | SAVPVEK--      | QGQTYNIT      | GV           | VEEELGGGSR                          | KRLRRKSMAGKS                        | IENVLT                                 | TVLEAMG-----FSPKDYD | YDLHINFP-G        | 435        |     |

|            |  | *680  | 690             | 700           | 710        | *                    | 730               | 740                    | 750                                | 760                               | 770    | 780    | ← P domain |          |             |           |             |       |          |     |     |     |
|------------|--|-------|-----------------|---------------|------------|----------------------|-------------------|------------------------|------------------------------------|-----------------------------------|--------|--------|------------|----------|-------------|-----------|-------------|-------|----------|-----|-----|-----|
| EcLonA     |  | ATPKD | GPSAGIAMCTALV   | SCLTGNPVRAD   | VAMTGEITL  | RGQVLPIGGLKEKLLAAHRG | GIKTVLIPFENKRDLEE | IPDNVIADLDIHPVKRIEEVLT | TALQNEPSGMQVVTAK                   | -----                             | -----  | -----  | 784        |          |             |           |             |       |          |     |     |     |
| BsLonA     |  | AVPKD | GPSAGITMATALV   | SALTGRAVSR    | EVGMTGEITL | RGRVLP               | PIGGLKEKALGAHRAGL | TTIIPAPKDNEKDIED       | IPESVREGLTFILASHLDEVLEHALVGEKK     | -----                             | -----  | -----  | 774        |          |             |           |             |       |          |     |     |     |
| BcLonA     |  | AVPKD | GPSAGITMATALV   | SALTGIPVSKEV  | GMTGEITL   | RGRVLP               | PIGGLKEKTL        | SAHRAGLTKIILPAENEKDLDD | IPESVKENLTFVLASHLDEVLEHALVGKQ      | -----                             | -----  | -----  | 782        |          |             |           |             |       |          |     |     |     |
| BhLonA     |  | ATPKD | GPSAGITMATALV   | SALTGRVVKKEV  | GMTGEITL   | RGRVLP               | PIGGLKEKMS        | SAHRAGLTTIIPKENEKDLDD  | IPKSVREDLNLYILVDHLDQVLKHALGEKK     | -----                             | -----  | -----  | 774        |          |             |           |             |       |          |     |     |     |
| BmLonA     |  | AVPKD | GPSAGITMATALV   | SALTGIPVSKEV  | GMTGEITL   | RGRVLP               | PIGGLKEKTL        | SAHRAGLTKIILPAENEKDLDD | IPESVKENLTFVLASHLDEVLEHALVGKQ      | -----                             | -----  | -----  | 776        |          |             |           |             |       |          |     |     |     |
| BpLonA     |  | AVPKD | GPSAGITMATALV   | SALTGRPVSK    | EVGMTGEITL | RGRVLP               | PIGGLKEKAL        | GAHRAGLTKIILPKDNEKDIDD | IPESVREGLTFIPVSHLDEVLEKALVGEGR     | -----                             | -----  | -----  | 774        |          |             |           |             |       |          |     |     |     |
| BbLonA     |  | AIPKD | GPSAGITMATALV   | SALTGKIPVKKEV | GMTGEITL   | RGRVLP               | PIGGLKEKMS        | SAHRAGLTTIILPKDNEKDIED | IPESVREGLTFYPVDHLDVLRHALTKQFPVGDKA | -----                             | -----  | -----  | 779        |          |             |           |             |       |          |     |     |     |
| GtLonA     |  | AVPKD | GPSAGITMATALV   | SALTGKPVSRF   | VGMTGEITL  | RGRVLP               | PIGGLKEKTL        | SAHRAGLTKVILPKDNEKDLAD | IPDTPVKRDLRFVLVSHLDEVLP            | PHALVGWER                         | -----  | -----  | 780        |          |             |           |             |       |          |     |     |     |
| PILonA     |  | AIPKD | GPSAGITMATALV   | SSLT          | KRHVAR     | DVAMTGEITL           | RGRVLP            | PIGGLKEKSLAAHRAGY      | KKILLPKDNERDLRDI                   | IPDSVKNDVEFVPSVSHMDQVLEHALVEQAGVH | -----  | -----  | 778        |          |             |           |             |       |          |     |     |     |
|            |  | 440   | *               | 450           | 460        | 470                  | 480               | *                      | 490                                | 500                               | 510    | 520    | 530        | 540      | 550         |           |             |       |          |     |     |     |
| BsLonBA-1  |  | GIPID | GPSAGIAMAGIFSAI | HKIPIDNT      | VAMTGEIS   | LNGLV                | KPIGGV            | IPKIKAAKQ              | SGAKKVIIPYENQQAI                   | ---                               | LKQIDG | -IEII  | AVKTFQEV   | LDEILVNP | PTEQKPFHI-E | ---       | INKE        | ---   | SV       | 552 |     |     |
| BsLonBA-2  |  | GIPID | GPSAGIAMAGIFSAI | HKIPIDNT      | VAMTGEIS   | LNGLV                | KPIGGV            | IPKIKAAKQ              | SGAKKVIIPYENQQAI                   | ---                               | LKQIDG | -IEII  | AVKTFQEV   | LDEILVNP | PTEQKPFHI-E | ---       | INKE        | ---   | SV       | 552 |     |     |
| BsLonBA-3D |  | GIPID | GPSAGIAMAGIFSAI | HKIPIDNT      | VAMTGEIS   | LNGLV                | KPIGGV            | IPKIKAAKQ              | SGAKKVIIPYENQQAI                   | ---                               | LKQIDG | -IEII  | AVKTFQEV   | LDEILVNP | PTEQKPFHI-E | ---       | INKE        | ---   | SV       | 552 |     |     |
| BcLonBA    |  | GIPID | GPSAGIAMATGV    | YSAVHHHTY     | VNNEVAMT   | GEISIH               | GEVVKPIGGV        | YAKIKAAKQ              | AGAKKVIIPYENQQAI                   | ---                               | LYTIKG | -IEII  | PVRKLKEV   | FELTFM   | QENMHRELDI  | HTTI--    | DETD        | QAQ   | ---      | SM  | 557 |     |
| BhLonBA    |  | GAPVD | GPSAGVAIATGI    | YSAIKEEK      | VNDNTVAMT  | GEISIH               | GTVPVGGV          | IAKVEAAKQ              | AGATRV                             | LIPKENEQAI                        | ---    | LQIEG  | -ITII      | PMKHLDDV | LSYALIRE    | EETEEETIP | ANQSFVSAP-- | A     | ---      | PV  | 556 |     |
| BmLonBA    |  | GIPID | GPSAGIAMATGV    | YSALHQVYV     | NNEIAMT    | GEISIH               | GEVVKPIGGV        | YAKIKAAKQ              | AGAKKVIIPYENQQAI                   | ---                               | LYTIKG | -IEII  | PVRKLKEV   | FALTFV   | QEKHREIDV   | HREL--    | DEGD        | VQ    | ---      | SM  | 556 |     |
| BpLonBA    |  | GAPID | GPSAGIAMATAI    | FSAIHQIP      | IDHLTAMT   | GEIGLQ               | QGVKPIGGV         | IPKIKAAKQ              | AGATRV                             | IIPYDNQ                           | QSI--  | LKEIEG | -VTIV      | PVKHFQEV | LDQCLV      | NPPDEK    | KGLEEE--    | MKRK  | ---      | SV  | 553 |     |
| BbLonBA    |  | GIPVD | GPSAGITMATALV   | SALTGIPVSKEV  | GMTGEITL   | RGRVLP               | PIGGLKEKTL        | SAHRAGLTKIILPAENEKDLDD | IPESVKENLTFVLASHLDEVLEHALVGKQ      | -----                             | -----  | -----  | 782        |          |             |           |             |       |          |     |     |     |
| GtLonBA    |  | GVPVD | GPSAGVAIATGI    | YSAIQVLP      | VNDNTVAMT  | GEISIH               | GVKVPVGGV         | FAKIKAAKQ              | AGAKKVIIPYENQQAI                   | ---                               | LREVS  | G-IQII | AVRRLE     | EALIHV   | FGEETLRR    | GTAFLP    | AAAAD       | RSGKK | ---      | LV  | 558 |     |
| PILonBA    |  | GTPID | GPSAGIAMATAI    | VSAIKGIE      | VNDNKIAMT  | GEMSIH               | GKVPVGGV          | IAKVEAAKQ              | AGATRV                             | LIPKDNWQSL                        | ---    | FQDLSG | GLRVI      | PVETV    | DEVFRQV     | FGGSLA    | DIVELP      | NTDIY | PASSASLL | 14  | GV  | 576 |

**Figure S1. Alignment of the primary and available or predicted secondary structures of *EcLonA* and bacillary *LonA* and *LonBA* proteases.**

*LonAs* and *LonBAs* are from: *Escherichia coli* (*EcLonA*, MER0000485, UniProt P0A9M0); *Bacillus subtilis* (*BsLonA*, MER0000487, UniProt P37945 and *BsLonBA*, MER0002228, UniProt G4ESU3); *B. cereus* (*BcLonA*, MER0029007, UniProt J7YLY7 and *BcLonBA*, MER0029009, UniProt C2NNG6); *B. halodurans* (*BhLonA*, MER0013686, UniProt Q9K8F6 and *BhLonBA*, MER0013716, UniProt Q9K8F5); *B. mycoides* (*BmLonA*, MER0231248, UniProt A0A084IV40 and *BmLonBA*, MER0399002, UniProt C3AR76); *B. pumilus* (*BpLonA*, MER0109288, UniProt A8FFV7 and *BpLonBA*, MER0164590, UniProt A0A8G1JA29); *Brevibacillus brevis* (*BbLonA*, MER0000486, UniProt C0ZAG5 and *BbLonBA*, MER0166780, UniProt C0ZAG4); *Geobacillus thermodenitrificans* (*GtLonA*, MER0090423, UniProt A4IRH0 and *GtLonBA*, MER0090424, UniProt A4IRH1); *Paenibacillus lactis* (*PILonA*, MER0299899, UniProt G4HHX1 and *PILonBA*, MER0361527, UniProt G4HHX2).

Domain organization is shown for *LonAs*. Primary structures were compared (by fragments) using the program <https://www.ebi.ac.uk/Tools/msa/clustalo/>, fragment boundaries were determined according to the secondary structures. Secondary structures of *BsLonBA-1* and *BsLonBA-2* were predicted using the programs <http://distilldeep.ucd.ie/porter/> and <https://colab.research.google.com/github/sokrypton/ColabFold/blob/main/AlphaFold2.ipynb>, correspondingly. Secondary structure of *BsLonBA* P domain (*BsLonBA-3D*) was determined in this work. Red color indicates amino acids that form  $\alpha$ -helices, purple – 3/10 helices, blue –  $\beta$ -strands; amino acids marked in black are not included in the secondary structure elements. Enzyme consensus elements are highlighted in yellow: Walker motifs A and B, Pore loop-1 with the conserved Tyr residue, Pore loop-2, RKH loop, SRH region, the residues sensor-1 (s1), sensor-2 (s2), and Arg finger (RF), catalytic residues Ser and Lys and their environment. Amino acid numbering is shown for the sequences of *EcLonA* and *BsLonBA*. ▼ – sites of limited proteolysis by chymotrypsin of *EcLonA* and *BsLonBA*.



|         |     |          |                        |         |                     |                          |                          |               |                 |               |                      |                  |     |
|---------|-----|----------|------------------------|---------|---------------------|--------------------------|--------------------------|---------------|-----------------|---------------|----------------------|------------------|-----|
|         |     | 380      | 390                    | 400     | 410                 | 420                      | 430                      | 440           | 450             | 460           | 470                  |                  |     |
| BsLonBA | 374 | SVTAAQD  | ---KGSINITGIAEESIGSQSK | SIRRKS  | MAKGSVENVLTVLRT     | MG                       | -----MKPSDYDIHINFP       | GGIPID        | GPSAGIAMAAGIFS  | AIHKIPIDNT    | VAMTG                | 471              |     |
|         |     | 470      | 480                    |         | 490                 | 500                      | 510                      | 520           | 530             | 540           |                      |                  |     |
| TonLonB | 461 | AVVAPAA  | SKKEGKIIVT             | GKLG    | -----EIAKEAVQNVSAI  | IKRYKGE                  | -----DISRYDIHVQFLQTYEGVE | GDSASISV      | ATAVISALEGIP    | IRQDVAMTG     | 549                  |                  |     |
| AfLonB  | 447 | AEVTPSM  | SKSEGRVIATGRL          | Q       | -----EIAREAVMNVS    | AIKKYTGR                 | -----DISNMDVHIQFVGTYEGVE | GDSASISI      | ATAVISALEGIP    | VDQSVAMTG     | 535                  |                  |     |
| MjLonB  | 479 | IIVQILE  | SKNPGTHLLN             | -ISG    | -----DIAKHSITLASALS | SKKLVAEKKLPLPKKDIDLNNKEI | YIQFSQSYSKID             | GDSATA        | AAVCLAIISALLDIP | LKQDFAITG     | 576                  |                  |     |
|         |     | 520      | 530                    |         | 540                 | 550                      | 560                      | 570           | 580             | 590           | 600                  |                  |     |
| MtaLonC | 517 | LTARAAP  | GRDHL-ISIDRE           | AGLGG   | -----QIFHKAVLTL     | AGYLRSRYIE               | -----HGSLPVTISLAF        | EQNYVSIE      | GDSAGLAELVA     | ALSAIGNLPLRQD | LAVTG                | 608              |     |
|         |     |          |                        |         |                     |                          |                          |               |                 |               |                      |                  |     |
|         |     | 480      | 490                    | 500     | 510                 | 520                      | 530                      | 540           | 550             | ← P domain    |                      |                  |     |
| BsLonBA | 472 | EISLNGLV | KPIGGV                 | VIPKIK  | -----AAQSGAK        | KVIIPYEN                 | QQ                       | -----AI       | -----LKQIDGIE   | IIIAVKTFQEV   | LDEILVNP             | PTEQKPFHIEINKESV | 552 |
|         |     | 550      | 560                    | 570     | 580                 | 590                      | 600                      | 610           | 620             | 630           |                      |                  |     |
| TonLonB | 550 | SLSVRGE  | VLPIGGAT               | PKIE    | -----AAIEAGIK       | MVVIIPKSNEK              | -----DVFLSKDKAEKI        | QIFPVETIDEV   | LEIALEESEK      | KRELLRRIRET   | TLPLSL               |                  | 635 |
| AfLonB  | 536 | SLSVKGE  | VLPGGV                 | TQKIE   | -----AAIQAGL        | KKVVIIPKDNID             | -----DVLLDAEHGKI         | EVIPVSRINEV   | LEHVLEDG        | KKKNRLMSK     | FKELELAAV            |                  | 621 |
| MjLonB  | 577 | SIDL     | SGNVLAIGGV             | NEKIE   | -----AAKRYGFK       | RVIIPEANMI               | -----DVIETEG             | -----IEIIPVKT | LDEIVPLV        | FDL           | DNRRGGAERFN          |                  | 649 |
|         |     | 610      | 620                    | 630     | 640                 | 650                      | 660                      | 670           | 680             | 690           | 700                  | 710              |     |
| MtaLonC | 609 | AVDQTGK  | VLAVGAI                | INAKVEG | FFRVCKALGLSGTQ      | GVILPEANLANLT            | LRAEVLEAVRAGQF           | HIYAVETAEO    | QALEILAGARME    | GFRGLQEKIR    | RAGLEAFARLEEGHDKEDRE |                  | 719 |

**Figure S2. Primary and secondary structure alignment of *BsLonBA*, LonBs and *MtaLonC* proteases based on experimental structures**

Enzyme sources: *Bacillus subtilis* – *BsLonBA* (MER0002228, UNIPROT P42425); *Thermococcus onnurineus* – *TonLonB* (MER0145010, UNIPROT B6YU74, PDB: 3K1J); *Archaeoglobus fulgidus* – *AfLonB* (MER0003868, UNIPROT O29883, PDB: 1Z0W/B,C,E,G,T,V); *Methanocaldococcus jannaschii* – *MjLonB* (MER0003359, UNIPROT Q58812, PDB: 1XHK); *Meiothermus taiwanensis* – *MtaLonC* (MER0423045, UNIPROT C9DRU9, PDB: 4FW9/D,G,H,V).

Predicted fragments of structures are shown in the standard font; experimentally determined structures and/or their fragments are highlighted in bold; sequence fragment of *MtaLonC* not seen in the crystal structure is italicized. Amino acid numbering is shown for the sequences of *BsLonBA*, *TonLonB*, and *MtaLonC*.

See all designations in the caption to Fig. S1. Substitutions of amino acid residues in Walker motifs are highlighted in gray.



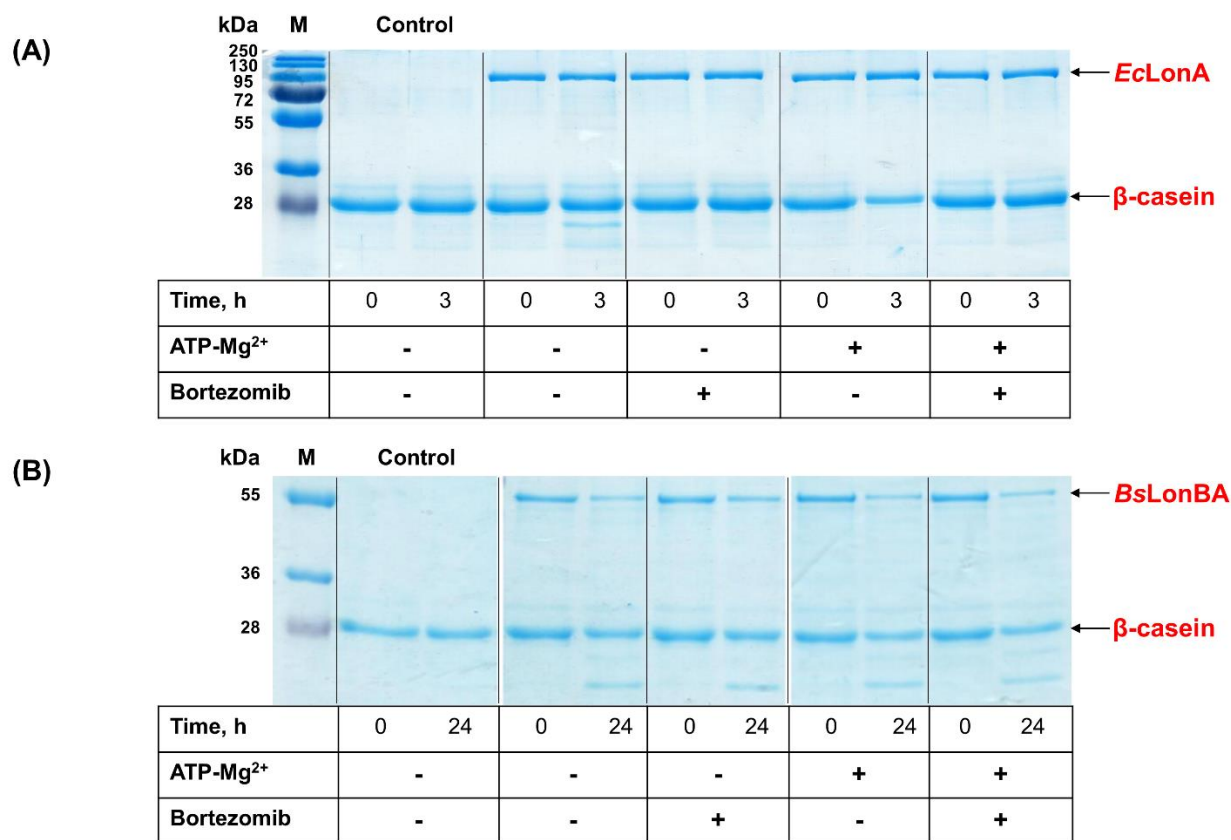

**Figure S3. Hydrolysis of  $\beta$ -casein by *EcLonA*-H6 (A) and *BsLonBA*-H6 (B).**

*Experimental conditions:* 15% PAGE, 50 mM Tris pH 8.3, 200 mM NaCl, 8 mM CHAPS buffer, 1 mM ATP, 10 mM MgCl<sub>2</sub>, 7.0 (A) or 5.0 (B)  $\mu$ M  $\beta$ -casein, 1.5  $\mu$ M *EcLonA*-H6, 3.0  $\mu$ M *BsLonBA*-H6, 35 (A) or 70 (B)  $\mu$ M bortezomib; 30 °C. Preincubation of the enzymes with bortezomib was carried out during 1 hour at 25 °C. M, molecular weight markers.

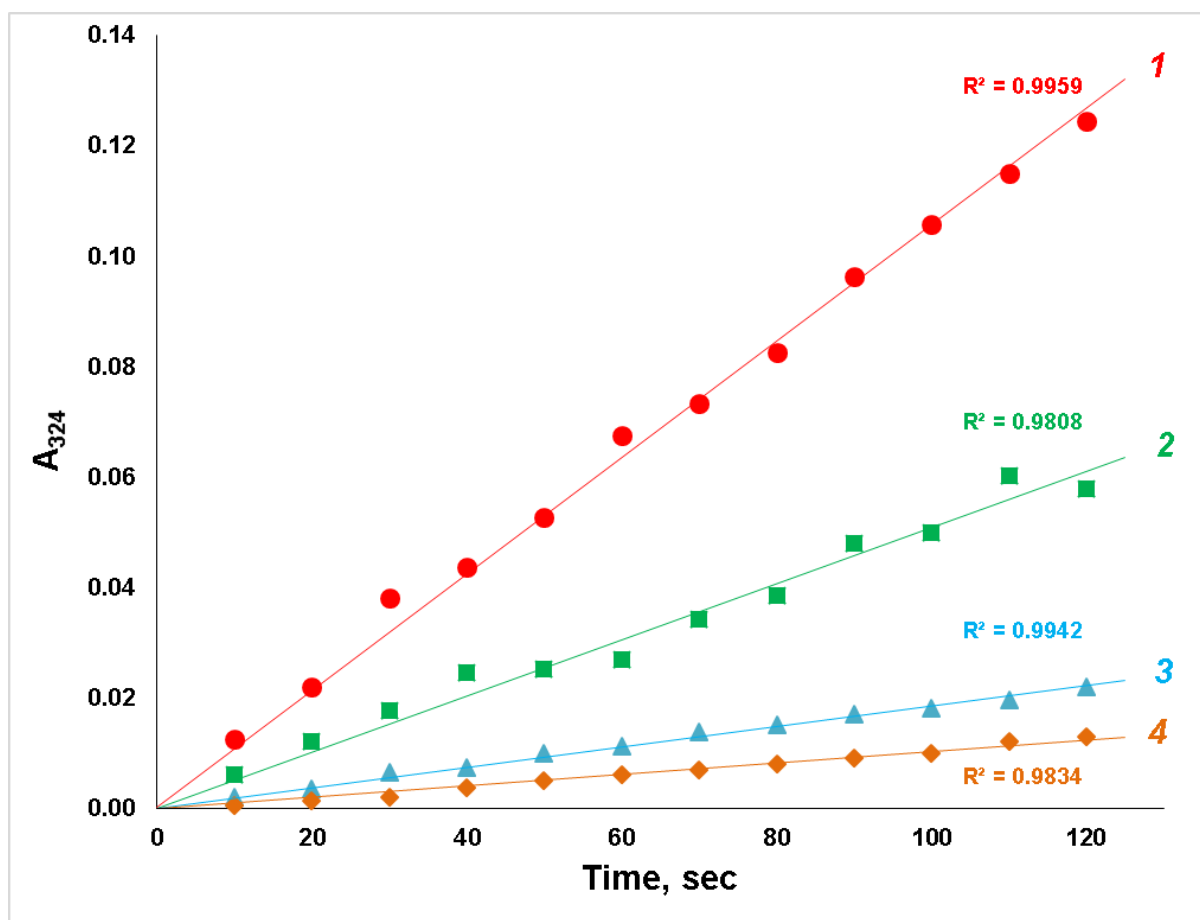

**Figure S4. Hydrolysis of PepTBE by *EcLonA*-H6 (1, 2) and *BsLonBA*-H6 (3, 4).**  
*Experimental conditions:* 50 mM Tris pH 8.3, 200 mM NaCl, 10% DMSO, 8 mM CHAPS buffer, 0.1 mM PepTBE, 0.2 mM DTDP, 0.5  $\mu$ M enzymes, 0.05 (2) or 1.0 (4)  $\mu$ M bortezomib; 30°C. The reactions were initiated by the addition of the substrate.
